# Supplementary material for: Success of a suicidal defense strategy against infection in a structured habitat
Source: PubMed Central journal article supplement — Sci Rep. 2012 Jan 30;2:238. doi: 10.1038/srep00238 (PMC3268160; doi:10.1038/srep00238), 2012-01-30
Supplement: srep00238-s1.pdf [file srep00238-s1.pdf]

## Supplementary Information

### Success of a suicidal defense strategy against infection in a structured habitat

Masaki Fukuyo<sup>a, b</sup>, Akira Sasaki<sup>c, d</sup>, Ichizo Kobayashi<sup>a, e, f, \*</sup>

a Department of Medical Genome Sciences, Graduate School of Frontier Sciences, Tokyo 108-8639,  
Japan

b Research Fellow of the Japan Society for the Promotion of Science (JSPS)

c Department of Evolutionary Studies of Biosystems (Sokendai-Hayama), The Graduate University  
for Advanced Studies (Sokendai), Hayama, Kanagawa 240-0193, Japan

d Evolution and Ecology Program, International Institute for Applied Systems Analysis, Laxenburg,  
Austria

e Institute of Medical Science, University of Tokyo, Tokyo, Japan;

f Department of Biophysics and Biochemistry, Graduate School of Science, University of Tokyo,  
Tokyo, Japan

\* Correspondence and requests for materials should be addressed to I.K.  
([ikobaya@ims.u-tokyo.ac.jp](mailto:ikobaya@ims.u-tokyo.ac.jp))

**SI Text:**

**SI Text 1: Legends for Supplementary Figures**

**SI Text 2: Detailed description of the model**

**Supplementary Animations:**

**Movie S1. Simulation at initial A:S =  $10^{-3}$ .**

**Movie S2. Simulation at initial A:S =  $10^3$ .**

**Supplementary Figures:**

**Figure S1. Changes of the A:S ratio after infection with pathogen Q, which does not induce suicide in either host.**

**Figure S2. Effect of population size on the A:S ratio change in the absence of spatial structure.**

**Figure S3. Detailed time-course analysis in the absence of spatial structure.**

**Figure S4. Dependency of the mutant pathogen emergence on spatial structure and the initial host ratio in the simulation.**

**Figure S5. Model for simulation in the presence of spatial structure.**

**Supplementary Tables:****Table S1. Pathogen mutants****Table S2. Bacteria, phages and plasmids** <sup>7, 21-28</sup>**Table S3. Symbols** <sup>29, 30</sup>**Supplementary References**

## SI Text 1: Supplementary Figure legends

**Figure S1. Changes of the A:S ratio after infection with pathogen Q, which does not induce suicide in either host.**

Final A:S ratio as a function of the initial A:S ratio. The averages  $\pm$  SEM are shown.  $n = 4$  for experiments and  $n = 100$  for simulations. The procedure was as for Fig. 2.

**Figure S2. Effect of population size on the A:S ratio change in the absence of spatial structure.**

Maximum population size was varied. With P pathogen (a, b) or Q pathogen (c, d). Individual results from simulations are shown for (a) and (c). The procedure was as for Fig. 2.

**Figure S3. Detailed time-course analysis.**

(a) Time-course of changes in hosts' densities and pathogen's density in an experiment without spatial structure. One out of four similar results. (b(i)) Time-course of changes in hosts' densities and pathogen's density in a simulation without spatial structure.

(b(ii)) Mutant frequencies in the two hosts and A:S ratio in a simulation without spatial structure. (c(i)) Time-course of changes in hosts' densities and pathogen's density in a simulation with spatial structure. (c(ii)) Mutant frequencies in the two hosts and A:S ratio in a simulation with spatial structure. One out of 100 similar simulation results.

**Figure S4. Emergence of the pathogen mutants not inducing host suicide.**

The measure of the fraction of the mutants is the ratio of the titer on host A to that on host S. It was measured after the infection period.  $N = 4$  for experiments. One out of 100 similar simulation results.

**Figure S5. Model for simulation in the presence of spatial structure.**

(a) Reproduction of host S (or  $S^R$ , A and  $A^R$ ). (b) Mutation of host S to  $S^R$ . Mutation of A to  $A^R$ . (c) Infection of host S with pathogen P (or Q). (d) Suicide of host A induced by infection with pathogen P. (e) Mutation of pathogen P to Q. (f) Adsorption of pathogen P (or Q) to S (or I,  $I^Q$  and A). (g) Death of host I (or  $I^Q$ ) accompanied by release of pathogen P (or Q)  $\tau$  min after infection.

## SI Text 2: Detailed description of the model

We modeled our virtual populations in a  $10000 \times 10000$  dual-lattice (Figure S1). One lattice was for the host, while the other was for the pathogen. We assume that each grid of the lattice has a side length  $1\mu m$ , and that each grid can harbor only one bacteria cell (whose diameter is about  $0.5\ \mu m$ ). The state of the  $i$ th site ( $i = 1, 2, \dots$ ) in the host lattice at time  $t$  is denoted by  $s_i^h(t) \in \Sigma^h \equiv \{S, S^R, A, A^R, I, I^Q, O\}$  (Table S2). The state S indicates the site occupied by a sensitive non-altruistic (non-suicidal) host,  $S^R$  does the site occupied by a pathogen-resistant non-altruistic (non-suicidal) host, A does the site occupied by an altruistic (suicidal) host,  $A^R$  does the site occupied by a pathogen-resistant altruistic (suicidal) host, I does the site occupied by an infected host,  $I^Q$  does the site occupied by a host infected with a mutant pathogen, while O is an empty site. The state of the  $i$ th site ( $i = 1, 2, \dots$ ) in the pathogen lattice at time  $t$  is denoted  $s_i^p(t) \in \Sigma^p \equiv \{P, Q, O\}$ . The state P indicates that the site is occupied by  $b$  (burst size) individual pathogens, Q indicates that the site is occupied by  $b$  of individual mutant pathogens, while O is an empty site. The state of the whole lattice population at time  $t$  is expressed by a vector  $W(t) = ((s_1^h(t), s_1^p(t)), (s_2^h(t), s_2^p(t)), \dots)$ .

Assuming a continuous-time Markov process, we specify the dynamics of  $W(t)$  by the following transition rates at the  $i$ th site ( $i = 1, 2, \dots$ ):

$$(O, *p) \rightarrow (S, *p), (A, *p) \quad \text{at rate } r(1-\mu)n_i(S)/z_r, \text{ and } r(1-\mu)n_i(A)/z_r, \quad (1)$$

$$(O, *p) \rightarrow (S^R, *p), (A^R, *p) \quad \text{at rate } r\mu n_i(S)/z_r + rn_i(S^R)/z_r, \\ \text{and } r\mu n_i(A)/z_r + rn_i(A^R)/z_r, \quad (2)$$

$$(S, *p) \rightarrow (I, *p) \quad \text{at rate } \beta(1-\mu)m_i^p(P)/Z_d, \quad (3)$$

$$(A, *p) \rightarrow (O, *p) \quad \text{at rate } \beta(1-\mu)m_i^p(P)/Z_d, \quad (4)$$

$$(S, *p), (A, *p) \rightarrow (I^Q, *p) \quad \text{at rate } \beta\mu m_i^p(P)/Z_d + \beta m_i^p(Q)/Z_d, \quad (5)$$

$$(I, *p) \rightarrow (O, P) \quad \text{after lysis time } \tau, \quad (6)$$

$$(*h, P) \rightarrow (*h, O) \quad \text{at rate } a(m_i^h(S) + m_i^h(I) + m_i^h(A))/Z_d, \quad (7)$$

where the variable  $n_i(s^h)$  is the number of sites with state  $s^h$  in the nearest-neighbors of the  $i$ th site of the host lattice,  $m_i^p(s^p)$  is the number of sites with state  $s^p$  in the  $d$  step neighbors of the  $i$ th site of the pathogen lattice (that is, the sites that are no further than  $d$  Manhattan distance, the sum of vertical and horizontal moves, from the  $i$ th site),  $m_i^h(s^h)$  is the number of sites with state  $s^h$  in the  $i$ th site and the  $d$  step neighbors of the  $i$ th site of the host lattice. The constant  $z_r = 4$  is the number of nearest neighbors of a site for host reproduction, and the constant  $Z_d = 1 + 2d(d+1)$  is the number of  $d$  step neighbor sites for pathogen infection and adsorption. The character  $*p$  is a wildcard state that can be replaced by any state from  $\Sigma^p$ , while  $*h$  is a wildcard state that can be replaced by any state from  $\Sigma^h$ .

Process (1) represents the reproduction of a sensitive non-altruistic host and an altruistic host to an empty site from a nearest-neighbor site on the host lattice, where  $\mu$  is a constant parameter representing mutation rate, and  $r$  is a constant parameter representing maximum fecundity of a sensitive non-altruistic host and an altruistic host, which is implemented when all nearest-neighbor sites in the host lattice are empty.

Process (2) represents the mutational-reproduction of a sensitive non-altruistic host and an altruistic host, and the reproduction of a resistant non-altruistic host and a resistant altruistic host to an empty site from a nearest-neighbor site in the host lattice.

Process (3) represents the infection of a sensitive non-altruistic host at the  $i$ th site by a pathogen in its  $d$  step neighbors, where  $\beta$  is a constant parameter representing the maximum productivity of pathogens, which is implemented when all the  $d$  step neighbor sites are occupied by sensitive non-altruistic hosts.

Process (4) also represents the infection of an altruistic host at the  $i$ th site by a pathogen in its  $d$  step neighbors.

Process (5) represents the mutational-transmission of a pathogen and transmission of a mutant pathogen to a host at the  $i$ th site from its  $d$  step neighbors.

Process (6) represents the lysis process of an infected non-altruistic host, where  $\tau$  is a constant parameter representing lysis time.



Process (7) represents the adsorption of  $b$  individual pathogens at the  $i$ th site by a host in its  $d$  step neighbors, where  $a(= \beta/b)$  is a constant parameter representing the maximum consumption of pathogens, which is implemented when all the  $d$  step neighbor sites are occupied by non-resistant hosts in the host lattice.

We refer to the variables  $n_i(s^h)/z_r$ ,  $m_i^p(s^p)/Z_d$ , and  $m_i^h(s^h)/Z_d$  as “local density”, which is used in the case of local interaction. In the case of global interaction, we refer to “global density”  $\rho^h(s^h)$  and  $\rho^p(s^p)$  instead.

$$(O,*p) \rightarrow (S,*p),(A,*p) \quad \text{at rate } r(1-\mu)\rho^h(S), \text{ and } r(1-\mu)\rho^h(A), \quad (1)'$$

$$(O,*p) \rightarrow (S^R,*p),(A^R,*p) \quad \text{at rate } r\mu\rho^h(S) + r\rho^h(S^R),$$

$$\text{and } r\mu\rho^h(A) + r\rho^h(A^R), \quad (2)'$$

$$(S,*p) \rightarrow (I,*p) \quad \text{at rate } \beta(1-\mu)\rho^p(P), \quad (3)'$$

$$(A,*p) \rightarrow (O,*p) \quad \text{at rate } \beta(1-\mu)\rho^p(P)\beta(1-\mu)\rho^p(P), \quad (4)'$$

$$(S,*p),(A,*p) \rightarrow (I^Q,*p) \quad \text{at rate } \beta\mu\rho^p(P) + \beta\rho^p(Q), \quad (5)'$$

$$(*h,P) \rightarrow (*h,O) \quad \text{at rate } a(\rho^h(S) + \rho^h(I) + \rho^h(A)), \quad (7)'$$

where  $\rho^h(s^h)$  is the number of sites with state  $s^h$  in the host lattice divided by the lattice size, and  $\rho^p(s^p)$  is the number of sites with state  $s^p$  in the pathogen lattice divided by the lattice size.

To initialize the simulation, every host lattice site was randomly and independently

assigned one of the state in  $\Sigma^h \equiv \{S, S^R, A, A^R, I, I^Q, O\}$ , and every pathogen lattice site was assigned as O. In the case of global interaction, each host is on a host lattice site, but it can interact with a pathogen wherever it is on the pathogen lattice. In the case of local interaction, each host can interact only with a pathogen in the nearest-neighbor site and its own site. Simulations were repeated 100 times for each condition.

The diffusion coefficient for phage,  $D$ , is described using the Stokes-Einstein relation:

$$D = \frac{k_B T}{6\pi\eta R}, \quad (8)$$

where  $R$  is approximately the radius of the phage head, and  $\eta$  is the viscosity of the medium,  $T$  is absolute temperature, and  $k_B$  is the Boltzmann constant. The maximum adsorption rate  $k$  corresponds to the case of total cell absorption, where the surface of the cell is entirely covered by receptors:

$$k = 4\pi c D, \quad (9)$$

where  $c$  is the cell radius. From equation (8) and (9), we calculated  $k = 47.5 \mu m^3 s^{-1}$  when  $R = 30 \text{ nm}$ ,  $T = 37 \text{ }^\circ\text{C} = 310 \text{ K}$ ,  $\eta = 0.01 \text{ P} = 0.01 \text{ g cm}^{-1} \text{ s}^{-1}$  [33],  $c = 0.5 \mu m$ , and  $k_B = 1.38 \times 10^{-23} \text{ m}^2 \text{ kg s}^{-2} \text{ K}^{-1}$ . We approximated  $k$  as the infection rate of the pathogen.

After  $b$  phage particles are released at time  $t=0$  at the origin, the concentration of the phage,  $C$ , would obey the diffusion equation:

$$\frac{\partial C(x,y,t)}{\partial t} = D \frac{\partial^2 C(x,y,t)}{\partial x^2} + D \frac{\partial^2 C(x,y,t)}{\partial y^2}, \quad (10)$$

where  $x, y$  is the position coordinate. The solution to (10) with the point initial concentration  $b/l^3$  (with  $l = 1 \mu\text{m} = 10^{-6} \text{m}$ ) at the point  $(x,y)$ , is

$$C(x,y,t) = \frac{b/l^3}{4\pi Dt} e^{-d^2/4Dt}, \quad (11)$$

where  $d = \sqrt{x^2 + y^2}$ . The maximum concentration of bacteria when all the grids of the lattice with side length  $l = 10^{-6} \text{m}$  are filled is  $B = l^{-3} = 10^{18} \text{m}^{-3}$ .

Thus the maximum absorption (infection) rate is  $\beta = Bk = 47.5 \text{ s}^{-1}$ , yielding

the mean time to absorption  $t_a = (\log b)/\beta = 0.0715 \text{ s}$ . The infection radius  $d^*$

then satisfies the equation

$$\frac{1}{l^3} = \frac{b}{l^3} \frac{1}{4\pi Dt_a} \exp\left[-\frac{d^{*2}}{4Dt_a}\right], \quad (12)$$

or  $d^* = 7.94 \mu\text{m}$ . The infection radius on the lattice is given by the integer part of  $d^*$

in units of  $\mu\text{m}$ :  $d = 7$ .

The growth rate of the host,  $r$ , satisfies the equation:

$$1 + r = 2^{1/t_B}, \quad (13)$$

where  $t_B$  is the doubling time of the host. From equation (13), we calculated  $r = 0.023$   $\text{min}^{-1}$  given that  $z_r = 4$ ,  $t_B = 30$  min.

## Supplementary References

24. Gillen, J. R., Willis, D. K. & Clark, A. J. Genetic-Analysis of the RecE Pathway of Genetic-Recombination in *Escherichia-Coli* K-12. *Journal of Bacteriology* **145**, 521-532 (1981).
25. Baba, T. et al. Construction of *Escherichia coli* K-12 in-frame, single-gene knockout mutants: the Keio collection. *Mol Syst Biol* **2**, 2006 0008 (2006).
26. Blattner, F. R. et al. The complete genome sequence of *Escherichia coli* K-12. *Science* **277**, 1453-& (1997).
27. Handa, N., Nakayama, Y., Sadykov, M. & Kobayashi, I. Experimental genome evolution: large-scale genome rearrangements associated with resistance to replacement of a chromosomal restriction-modification gene complex. *Molecular Microbiology* **40**, 932-940 (2001).
28. Handa, N., Ohashi, S., Kusano, K. & Kobayashi, I. chi\*, a chi-related 11-mer sequence partially active in an *E-coli* recC\* strain. *Genes to Cells* **2**, 525-536 (1997).
29. Lobocka, M. B. et al. Genome of bacteriophage P1. *Journal of Bacteriology* **186**, 7032-7068 (2004).
30. Nakayama, Y. & Kobayashi, I. Restriction-modification gene complexes as selfish gene entities: Roles of a regulatory system in their establishment, maintenance, and

- apoptotic mutual exclusion. *Proceedings of the National Academy of Sciences of the United States of America* **95**, 6442-6447 (1998).
31. Shao, Y. P. & Wang, I. N. Bacteriophage adsorption rate and optimal lysis time. *Genetics* **180**, 471-482 (2008).
32. Gadagkar, R. & Gopinathan, K. P. Bacteriophage burst size during multiple infections. *Journal of Biosciences* **2**, 253-259 (1980).
33. Nagashima, A. Viscosity of Water Substance - New International Formulation and Its Background. *Journal of Physical and Chemical Reference Data* **6**, 1133-1166 (1977).

(a) with spatial structure, experiment

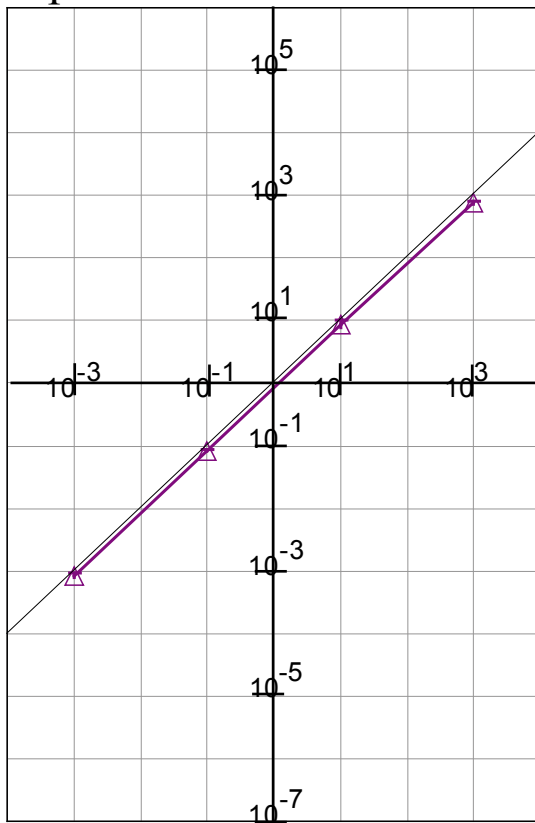

(b) without spatial structure, experiment

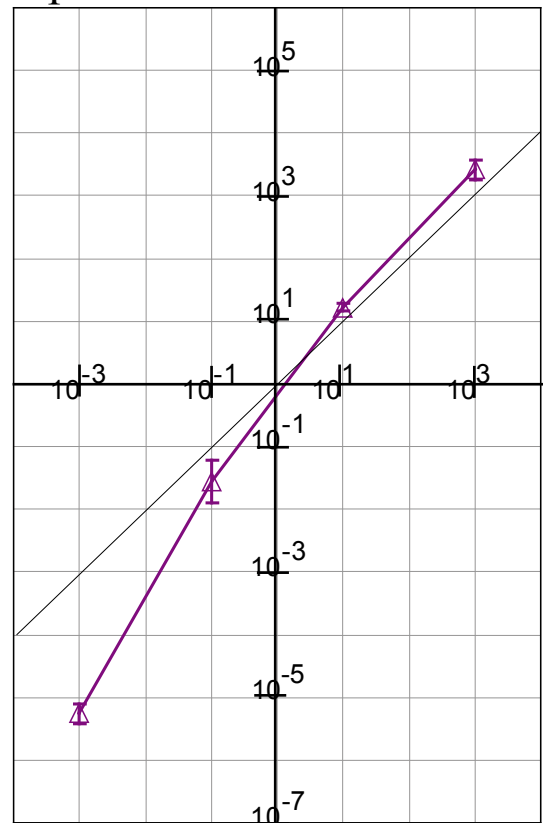

(c) with spatial structure, simulation

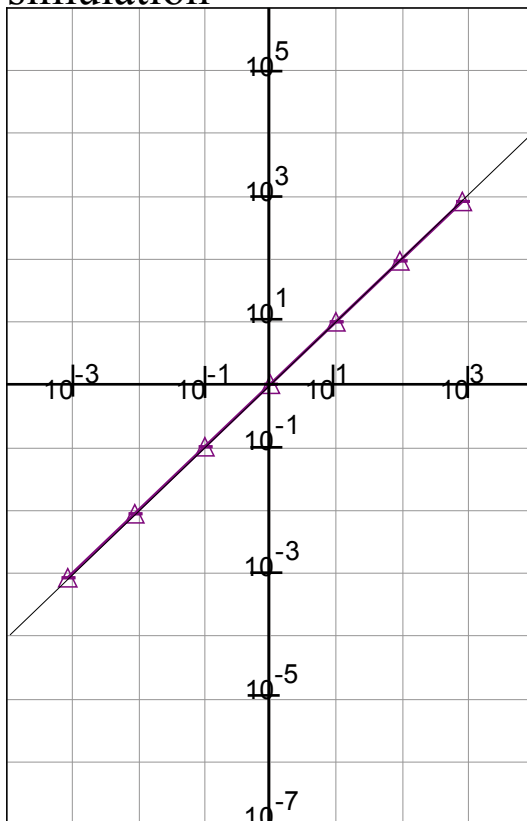

(d) without spatial structure, simulation

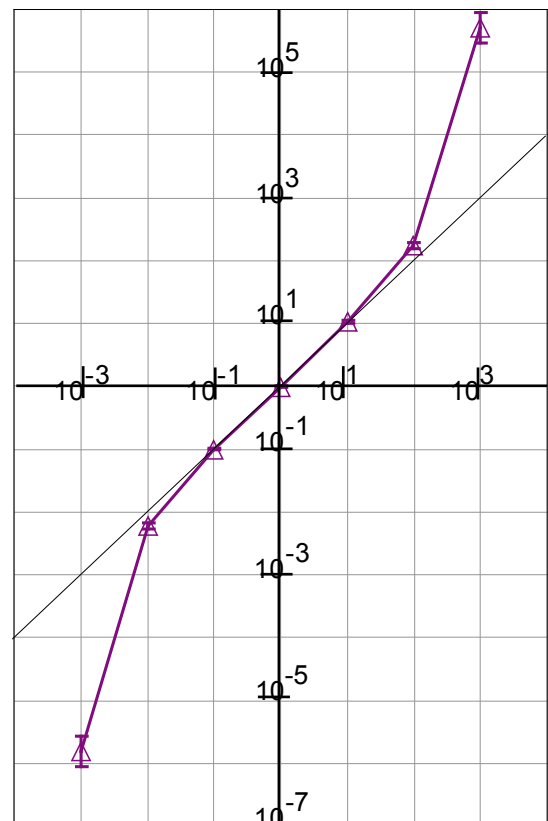

$\frac{[A = \text{altruistic host}]}{[S = \text{non-altruistic host}]}$  after incubation

initial  $\frac{[A = \text{altruistic host}]}{[S = \text{non-altruistic host}]}$

Figure S1

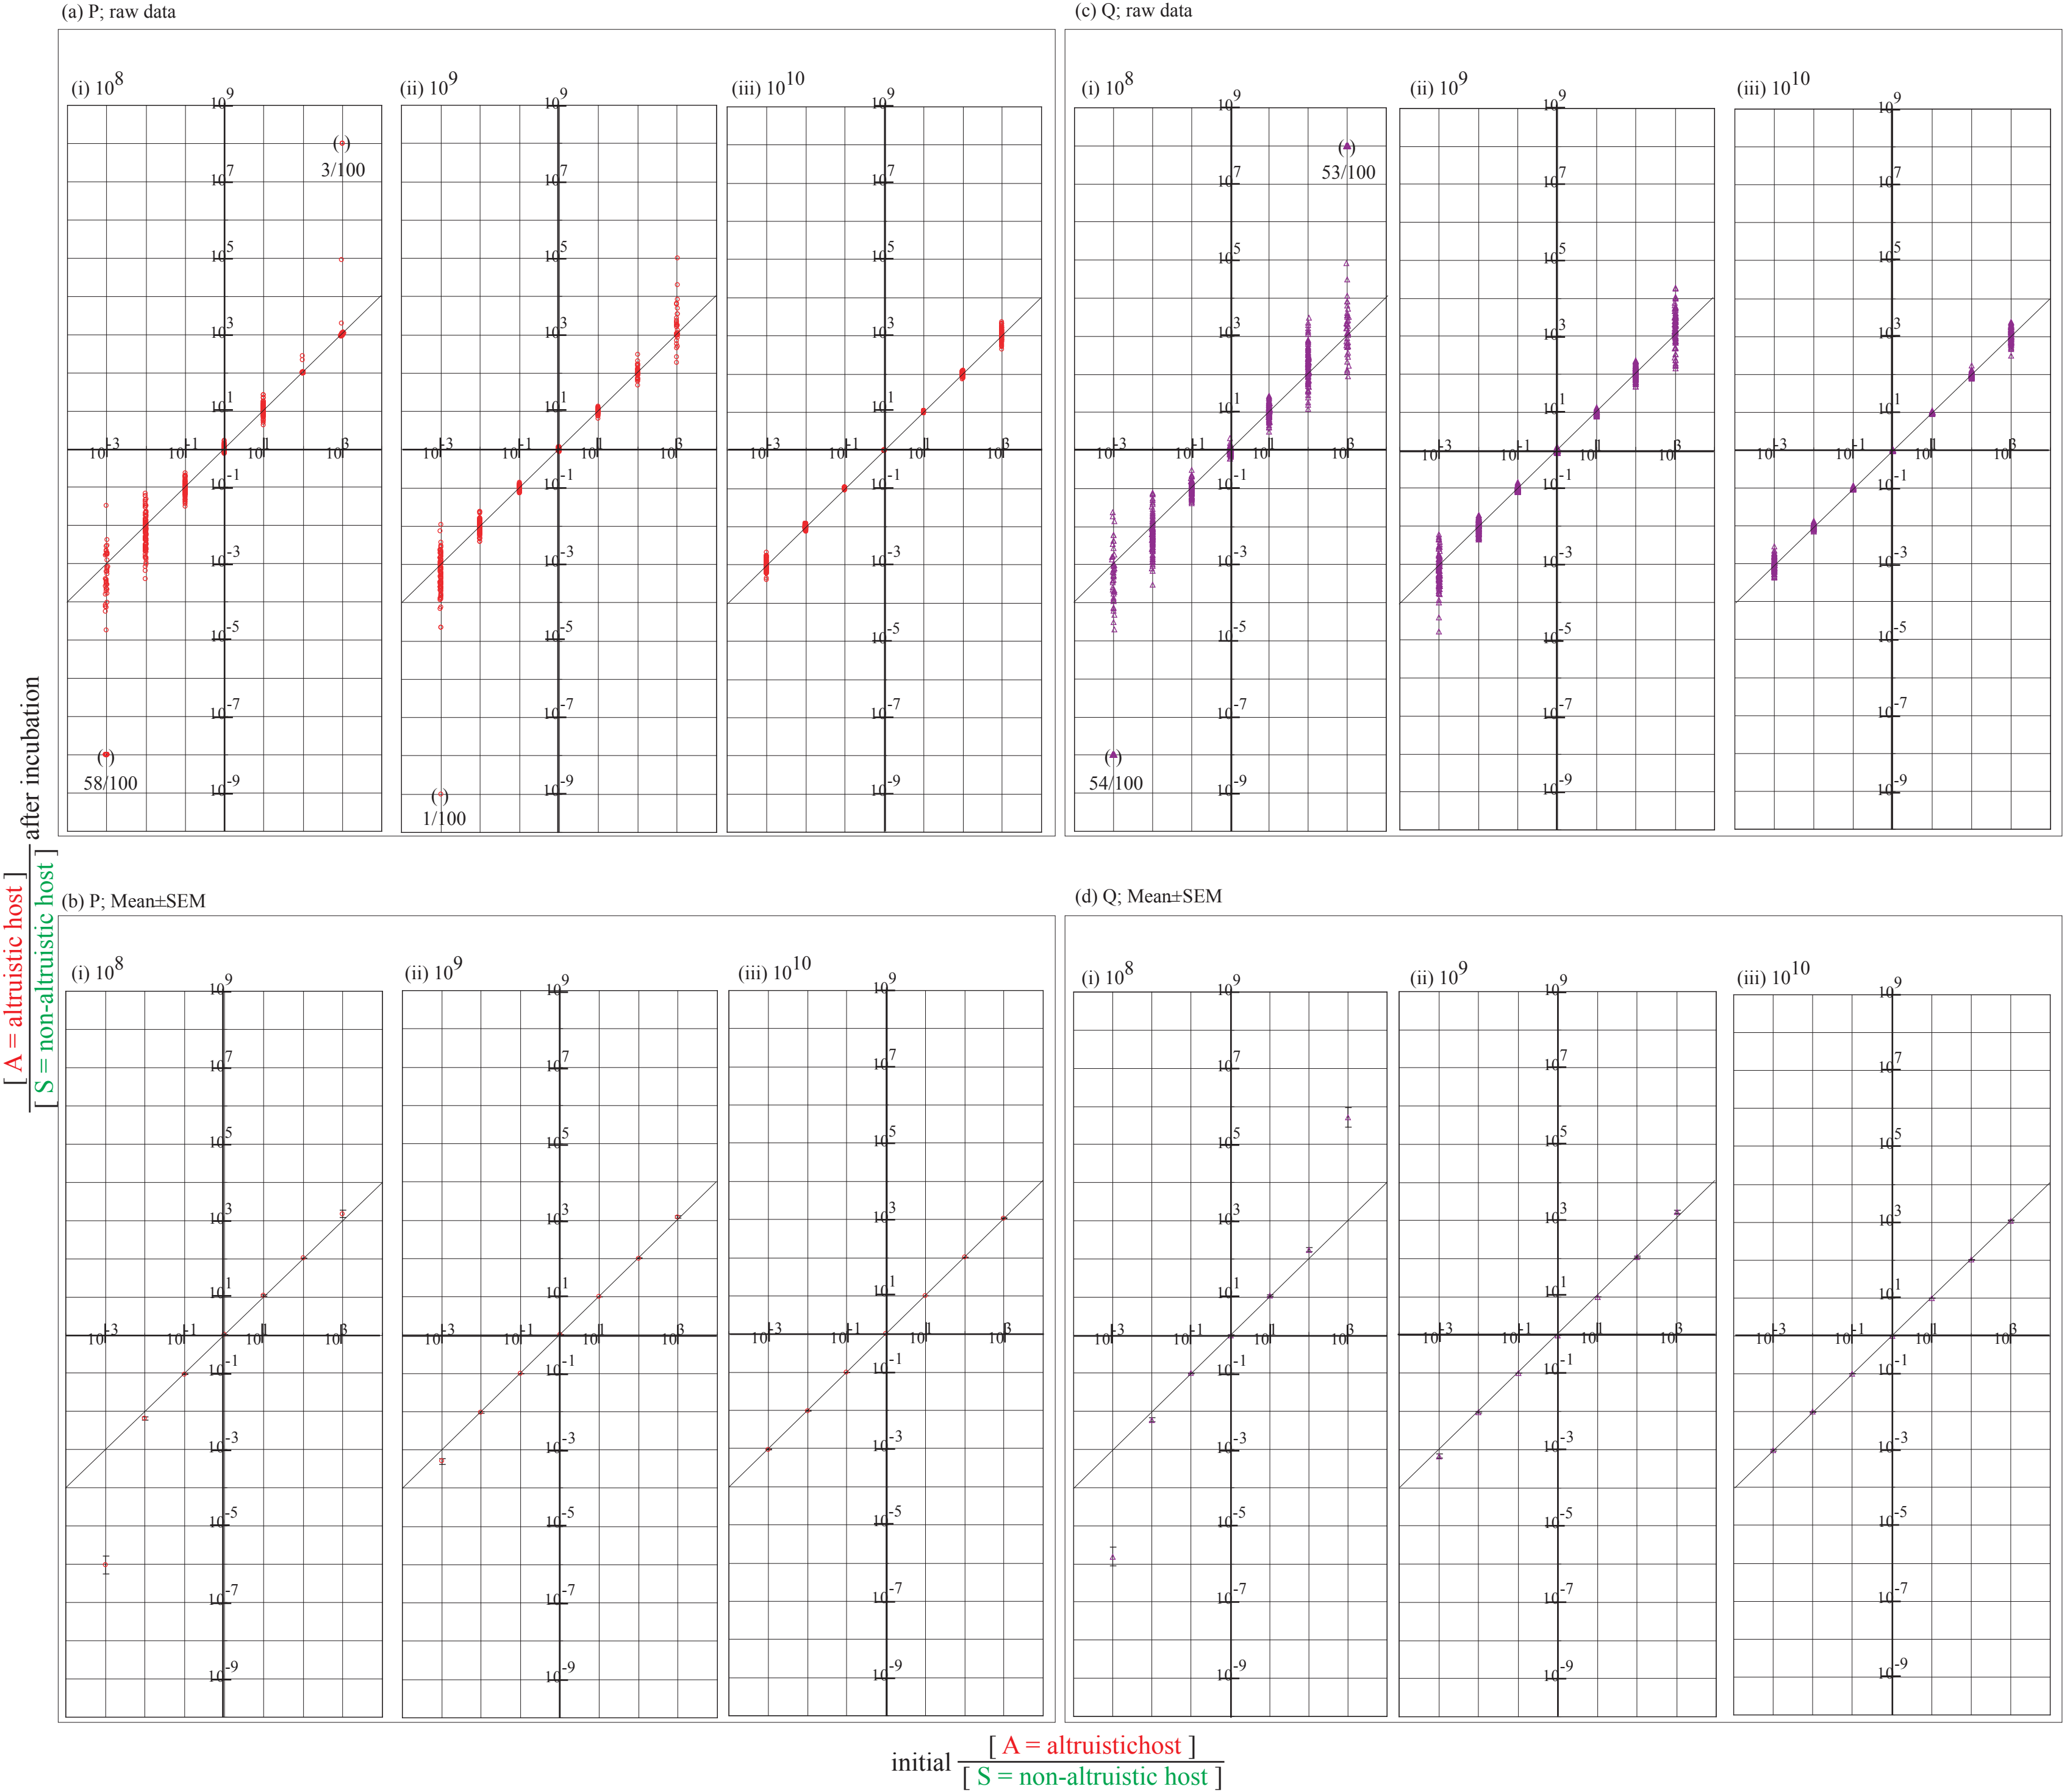

FigS2



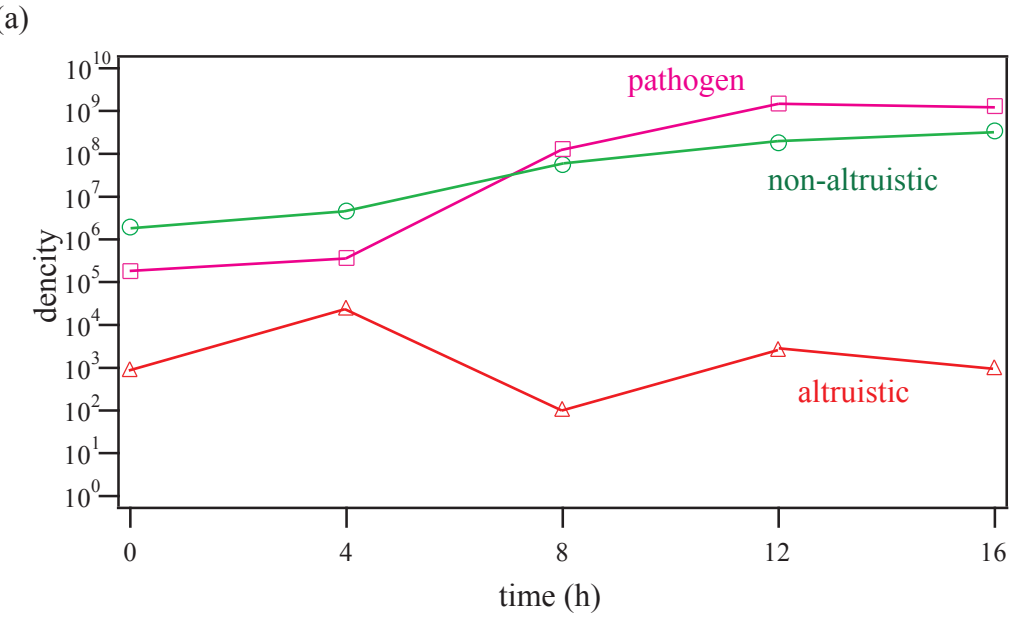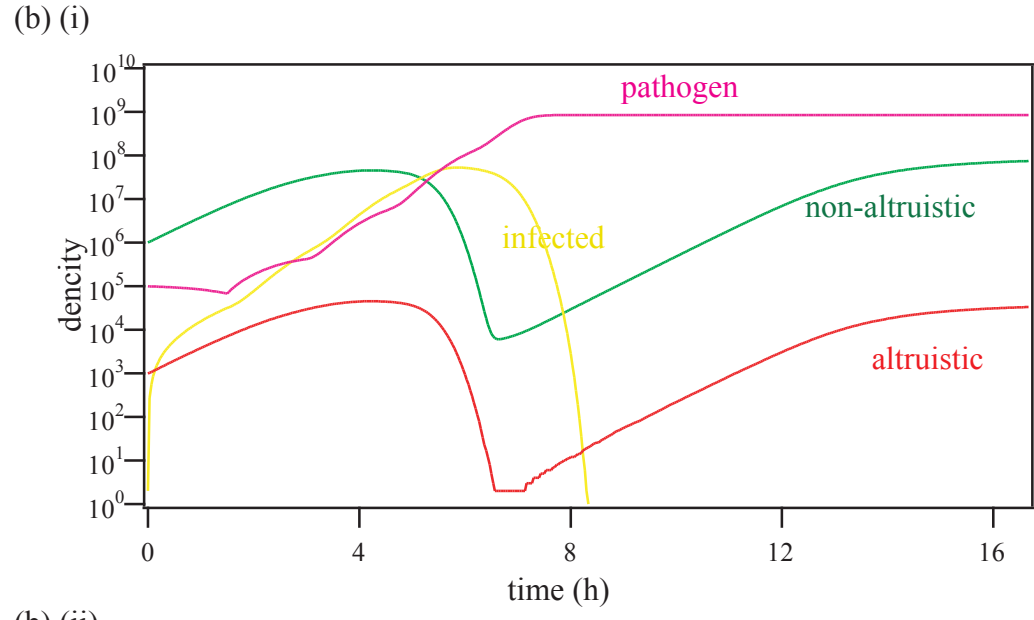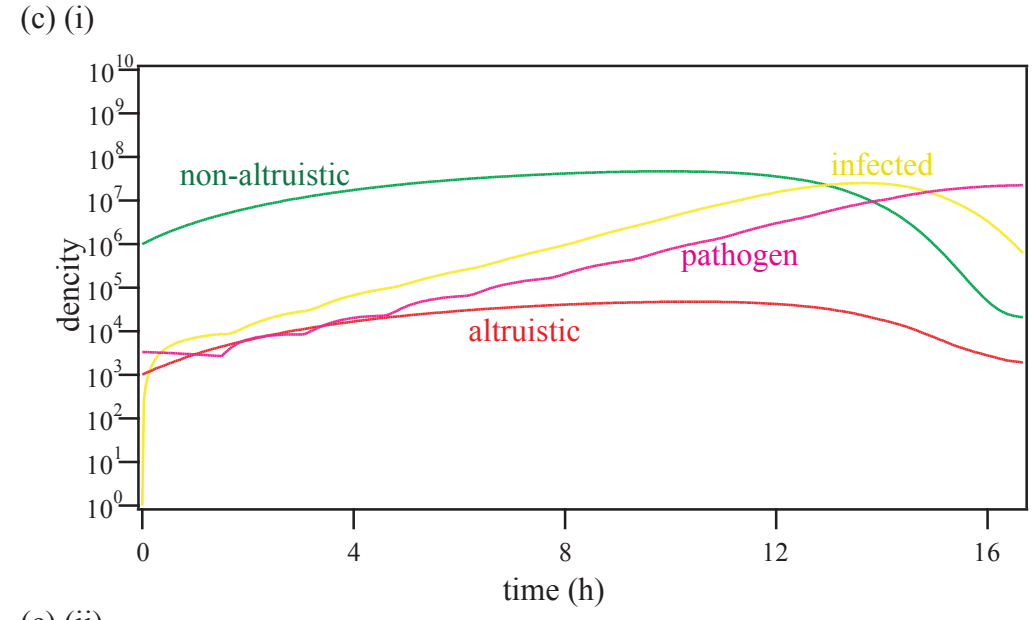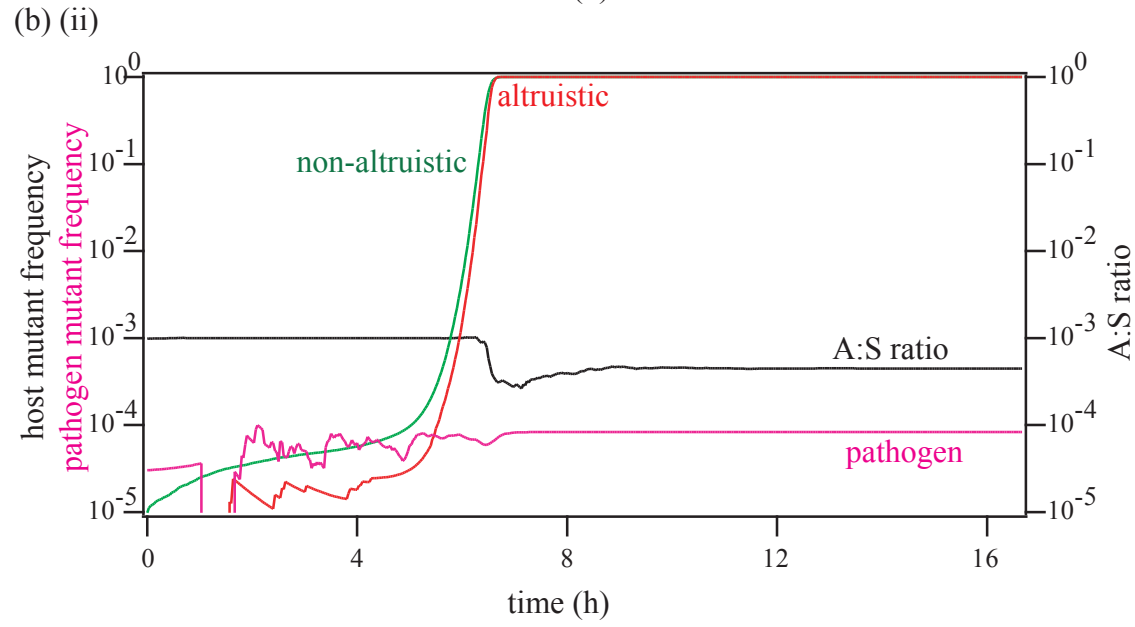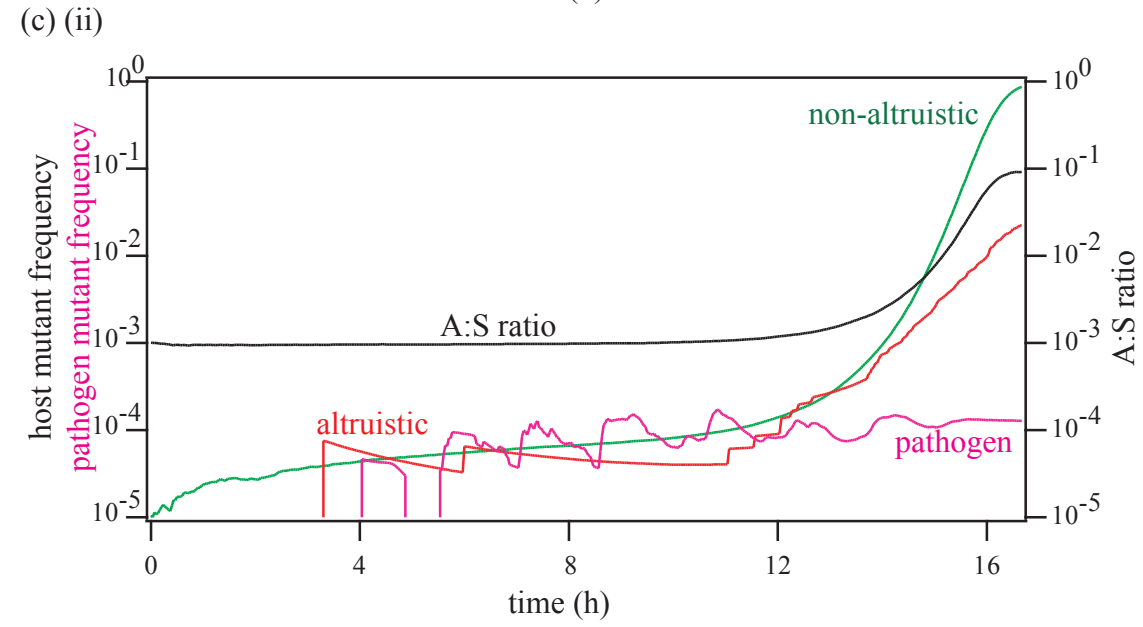

FigS3

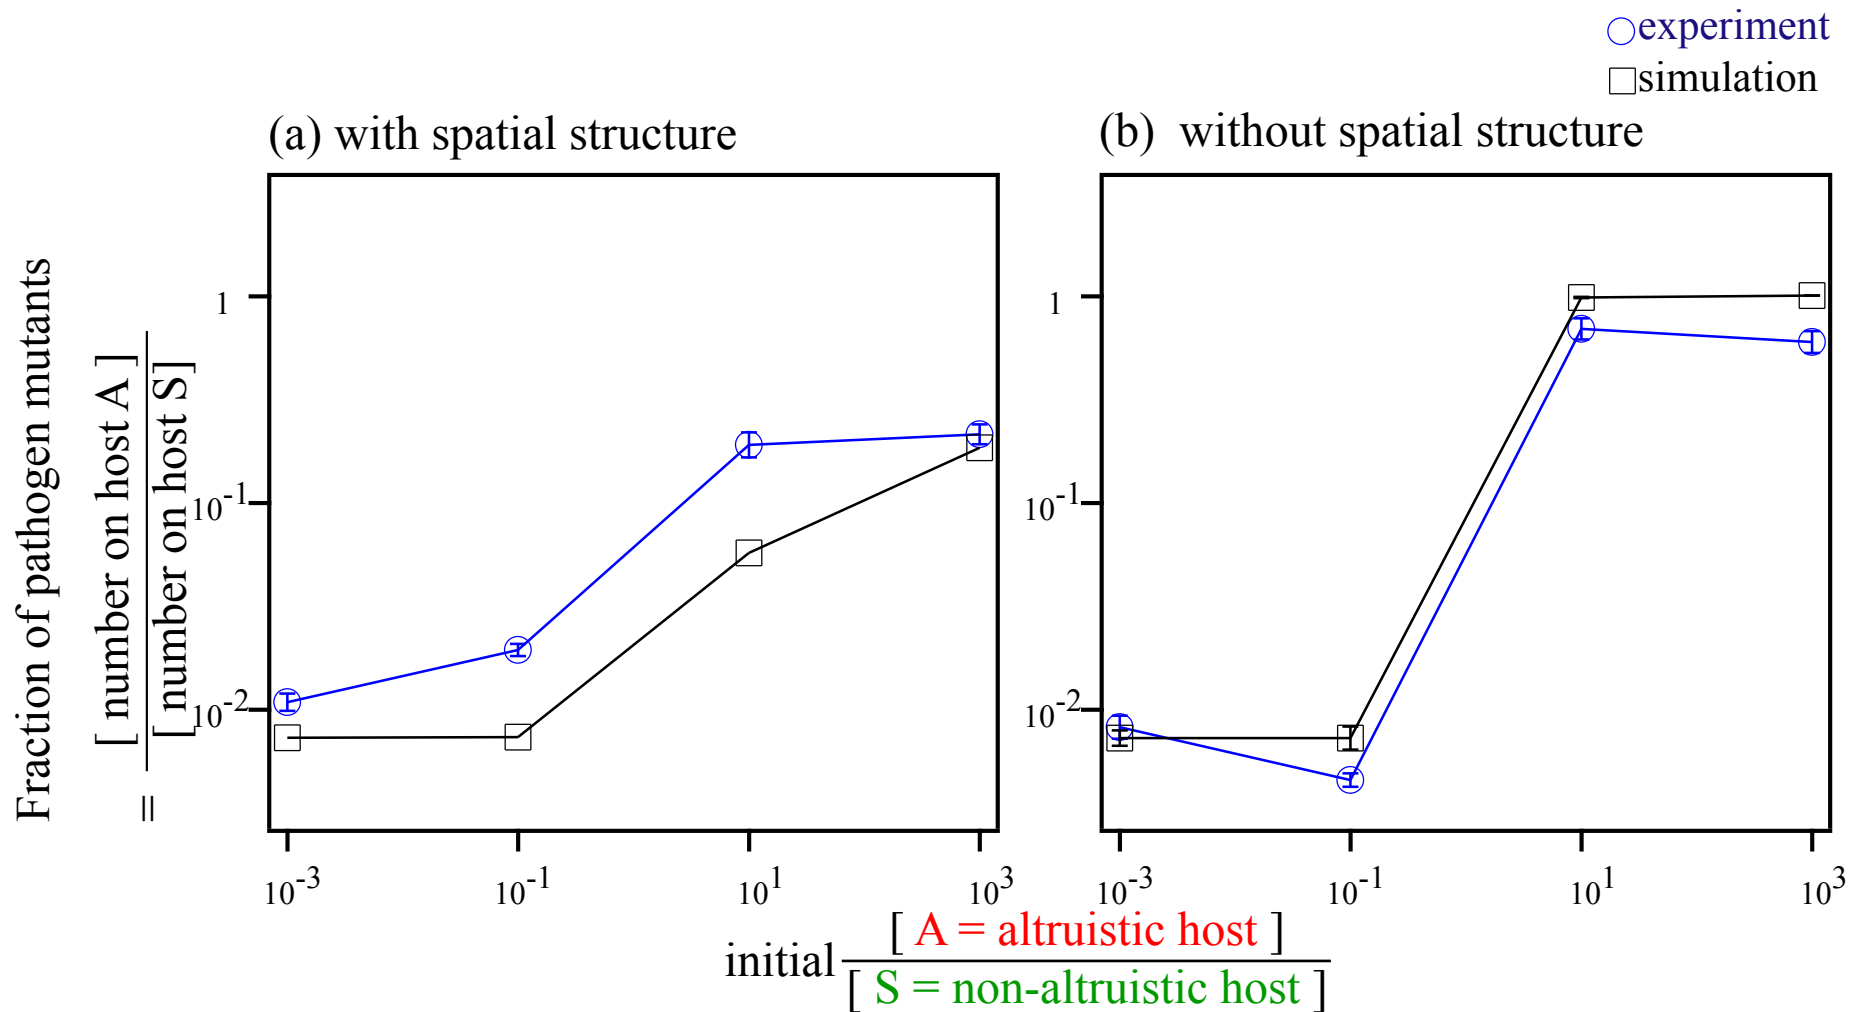

Fig. S4

(a) reproduction

(b) mutation

(c) infection of S

(d) infection of A

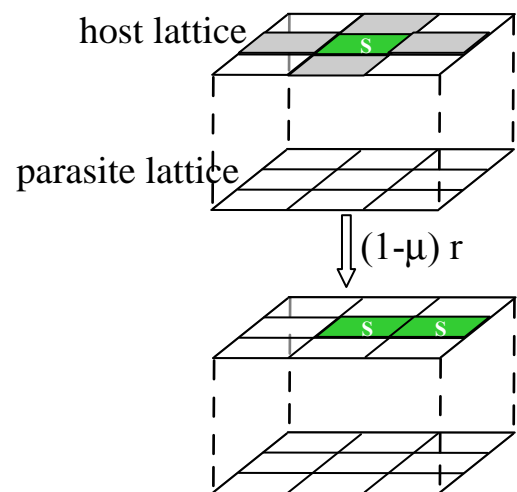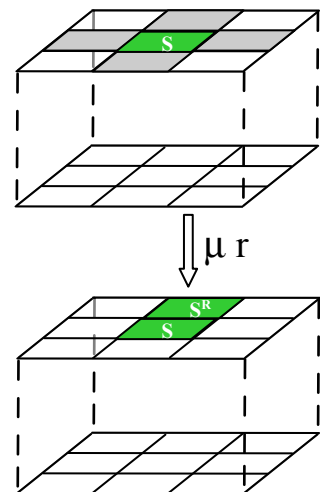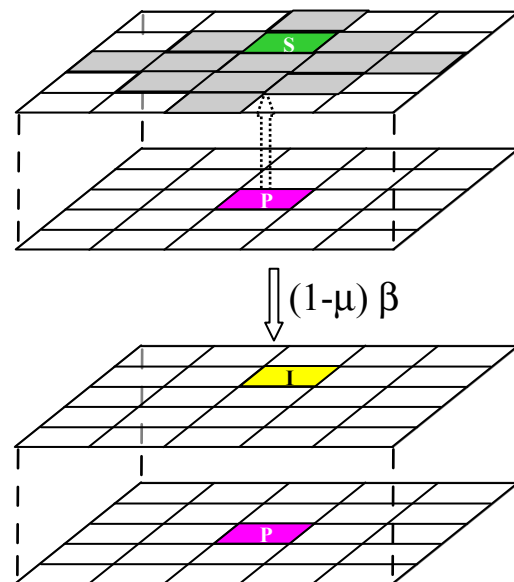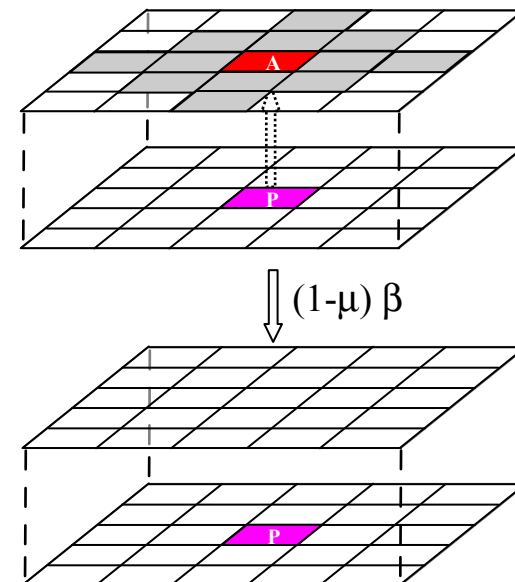

(e) mutation

(f) adsorption

(g) burst

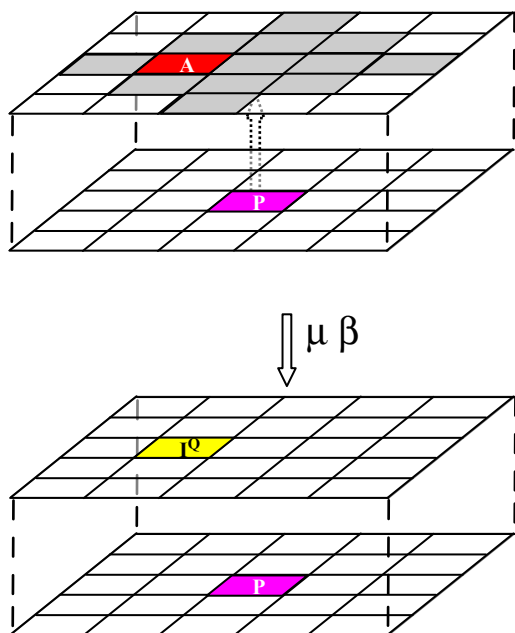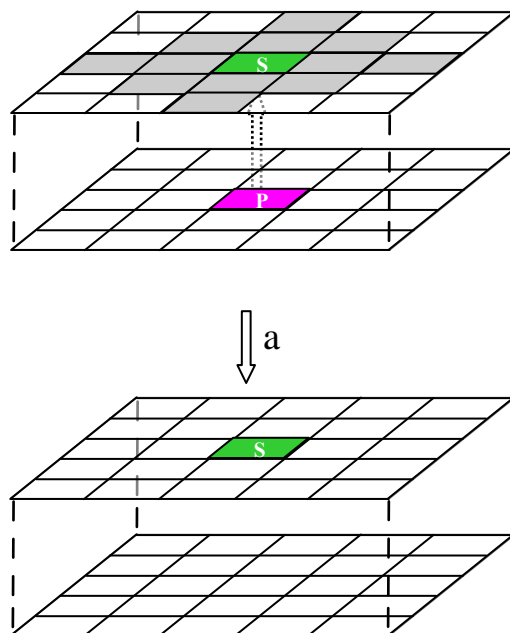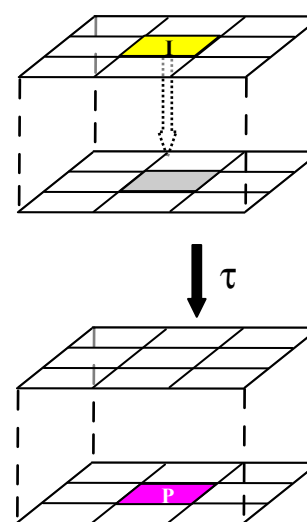

Fig. S5

Table S1. Pathogen mutants.

| Tube number | Isolate number | Nucleotide position | Codon change | Amino acid change |
|-------------|----------------|---------------------|--------------|-------------------|
| 1           | 3              | 186                 | AAA → AAAa   | K62frameshift     |
|             | 4              | 371                 | GGT → GtT    | G124V             |
|             | 5              | 186                 | AAA → AAAa   | K62frameshift     |
|             | 6              | 371                 | GGT → GtT    | G124V             |
| 2           | 7              | 923                 | TTA → T-A    | L308frameshift    |
|             | 8              | 923                 | TTA → T-A    | L308frameshift    |
|             | 9              | 425                 | CCT → CaT    | P142H             |
|             | 9              | 858                 | GAA → GA-    | E286frameshift    |
|             | 10             | 425                 | CCT → CaT    | P142H             |
| 3           | 11             | 434                 | TGG → TtG    | W145L             |
|             | 12             | 118                 | GAA → tAA    | E40stop           |
|             | 13             | 823                 | GGC → tGC    | G275C             |
|             | 14             | 118                 | GAA → tAA    | E40stop           |
| 4           | 15             | 187                 | GAA → aGAA   | E63frameshift     |
|             | 15             | 923                 | TTA → TT-    | L308frameshift    |
|             | 16             | 923                 | TTA → TTtA   | L308frameshift    |
|             | 17             | 187                 | GAA → aGAA   | E63frameshift     |
|             | 18             | 187                 | GAA → aGAA   | E63frameshift     |

Table S2. Bacteria, phages and plasmids

| Symbol   | Bacterial strain                 | Genotype                                                                                                                                                 | Comments                  | Source and reference                 |
|----------|----------------------------------|----------------------------------------------------------------------------------------------------------------------------------------------------------|---------------------------|--------------------------------------|
|          | JC8679                           | <i>F<sup>-</sup> thr-1 leuB-6 phi-1 lacY1 galK2 ara-14 xyl-5 mtl-1 proA2 his-4 argE3 rpsL31 tsx-33 supE44 recB21 recC22 sbcA23 his-328 λ<sup>-</sup></i> |                           | A. J. Clark, (22)                    |
|          | JW5871                           | BW25113 <i>mcrB::kan</i>                                                                                                                                 |                           | National Institute of Genetics, (23) |
|          | MG1655                           | <i>F<sup>-</sup> lambda<sup>-</sup> ilvG<sup>-</sup> rfb -50 rph -1</i>                                                                                  |                           | D. Biek, (24)                        |
|          | BIK2146                          | JC8679 <i>lacZ::cml</i>                                                                                                                                  |                           | N. Handa, (25)                       |
| A<br>S   | BMF1                             | JC8679 <i>mcrB::kan</i>                                                                                                                                  | P1 from JW5871 to JC8679  | this work                            |
|          | BMF3                             | MG1655 <i>lacZ::cml</i>                                                                                                                                  | P1 from BIK2146 to MG1655 | this work                            |
|          | BMF5                             | MG1655 <i>mcrB::kan</i>                                                                                                                                  | P1 from JW5871 to MG1655  | this work                            |
|          | BMF22                            | BMF3 carrying pMF8                                                                                                                                       |                           | this work                            |
|          | BMF24                            | BMF5 carrying pMF8                                                                                                                                       |                           | this work                            |
|          | BMF28                            | BMF5 carrying pMF9                                                                                                                                       |                           | this work                            |
|          | BMF30                            | BMF3 carrying pMF9                                                                                                                                       |                           | this work                            |
|          | BMF35                            | BMF5 carrying pYNEC323                                                                                                                                   |                           | this work                            |
|          | BMF37                            | BMF5 carrying pYNEC324                                                                                                                                   |                           | this work                            |
|          | Phage strain                     | Genotype                                                                                                                                                 | Source and reference      |                                      |
| P        | LEF1                             | <i>BamI<sup>0</sup> ΔB int<sup>-</sup> pvuIIM Δ(red-gam ) imm21 nin5 shn6<sup>0</sup></i>                                                                |                           | E. Fukuda, (7)                       |
| Q        | LIK891                           | <i>BamI<sup>0</sup> ΔB int+ Δ(red-gam ) imm21 nin5 shn6<sup>0</sup></i>                                                                                  |                           | N. Handa, (26)                       |
|          | λvir                             |                                                                                                                                                          |                           | A.Miura, (21)                        |
|          | P1 vir                           |                                                                                                                                                          |                           | H. Ikeda, (27)                       |
| Plasmids | Relevant characteristics         | Prototype plasmid                                                                                                                                        | Drug resistance           | Source and reference                 |
| pYNEC323 | <i>pvuIIRMC cml</i>              | pIK153                                                                                                                                                   | Cml                       | Y. Nakayama, (28)                    |
| pYNEC324 | <i>pvuIIR<sup>-</sup> MC cml</i> | pIK153                                                                                                                                                   | Cml                       | Y. Nakayama, (28)                    |
| pMF8     | <i>mrfp</i>                      | pUC19                                                                                                                                                    | Amp                       | this work                            |
| pMF9     | <i>gfpuv</i>                     | pUC19                                                                                                                                                    | Amp                       | this work                            |

*kan* , kanamycin-resistance gene; *cml* , chloramphenicol-resistance gene.

**Table S3. Symbols.**

| Symbol                  | Definition                                                        |                         |
|-------------------------|-------------------------------------------------------------------|-------------------------|
| <b>Host</b>             |                                                                   |                         |
| S                       | Susceptible; Non-altruistic type                                  |                         |
| A                       | Altruistic type                                                   |                         |
| I                       | Infected form of S by P                                           |                         |
| S <sup>R</sup>          | Mutant form of S resistant to pathogen                            |                         |
| A <sup>R</sup>          | Mutant form of A resistant to pathogen                            |                         |
| I <sup>Q</sup>          | Infected form of S by Q                                           |                         |
| <b>Pathogen</b>         |                                                                   |                         |
| P                       | Induces suicide in S host                                         |                         |
| Q                       | Mutant defective in induction of suicide                          |                         |
| <b>Host lattice</b>     |                                                                   |                         |
| O-site                  | Empty                                                             |                         |
| S-site                  | Occupied by non-altruistic host                                   |                         |
| S <sup>R</sup> -site    | Occupied by resistant non-altruistic host                         |                         |
| I-site                  | Occupied by infected host                                         |                         |
| I <sup>Q</sup> -site    | Occupied by mutant infected host                                  |                         |
| A-site                  | Occupied by altruistic host                                       |                         |
| A <sup>R</sup> -site    | Occupied by resistant altruistic host                             |                         |
| <b>Pathogen lattice</b> |                                                                   |                         |
| O-site                  | Empty                                                             |                         |
| P-site                  | Occupied by pathogen                                              |                         |
| Q-site                  | Occupied by mutant pathogen                                       |                         |
| invariable              |                                                                   | Value                   |
| $z_r$                   | Number of nearest-neighbors for reproduction                      | 4                       |
| $Z_d$                   | Number of d (=7) step neighbor sites for infection and adsorption | 113                     |
| r                       | Growth rate of host                                               | 0.023 min <sup>-1</sup> |
| $\beta$                 | Infection rate of pathogen                                        | 47.5 s <sup>-1</sup>    |
| $\tau$                  | Lysis time of infected host                                       | 60 min (30)             |
| $\mu$                   | Mutation rate of host and pathogen                                | 1.00E-5                 |
| a                       | Adsorption rate of lambda phage                                   | 1.58 s <sup>-1</sup>    |
| d                       | Infection radius                                                  | 7                       |
| b                       | Burst size of pathogen                                            | 30 (29)                 |
